# Supplementary material
Source: PubMed Central journal article supplement (PMC5858560)

# RO3857

256 kinases (231 wild-type)

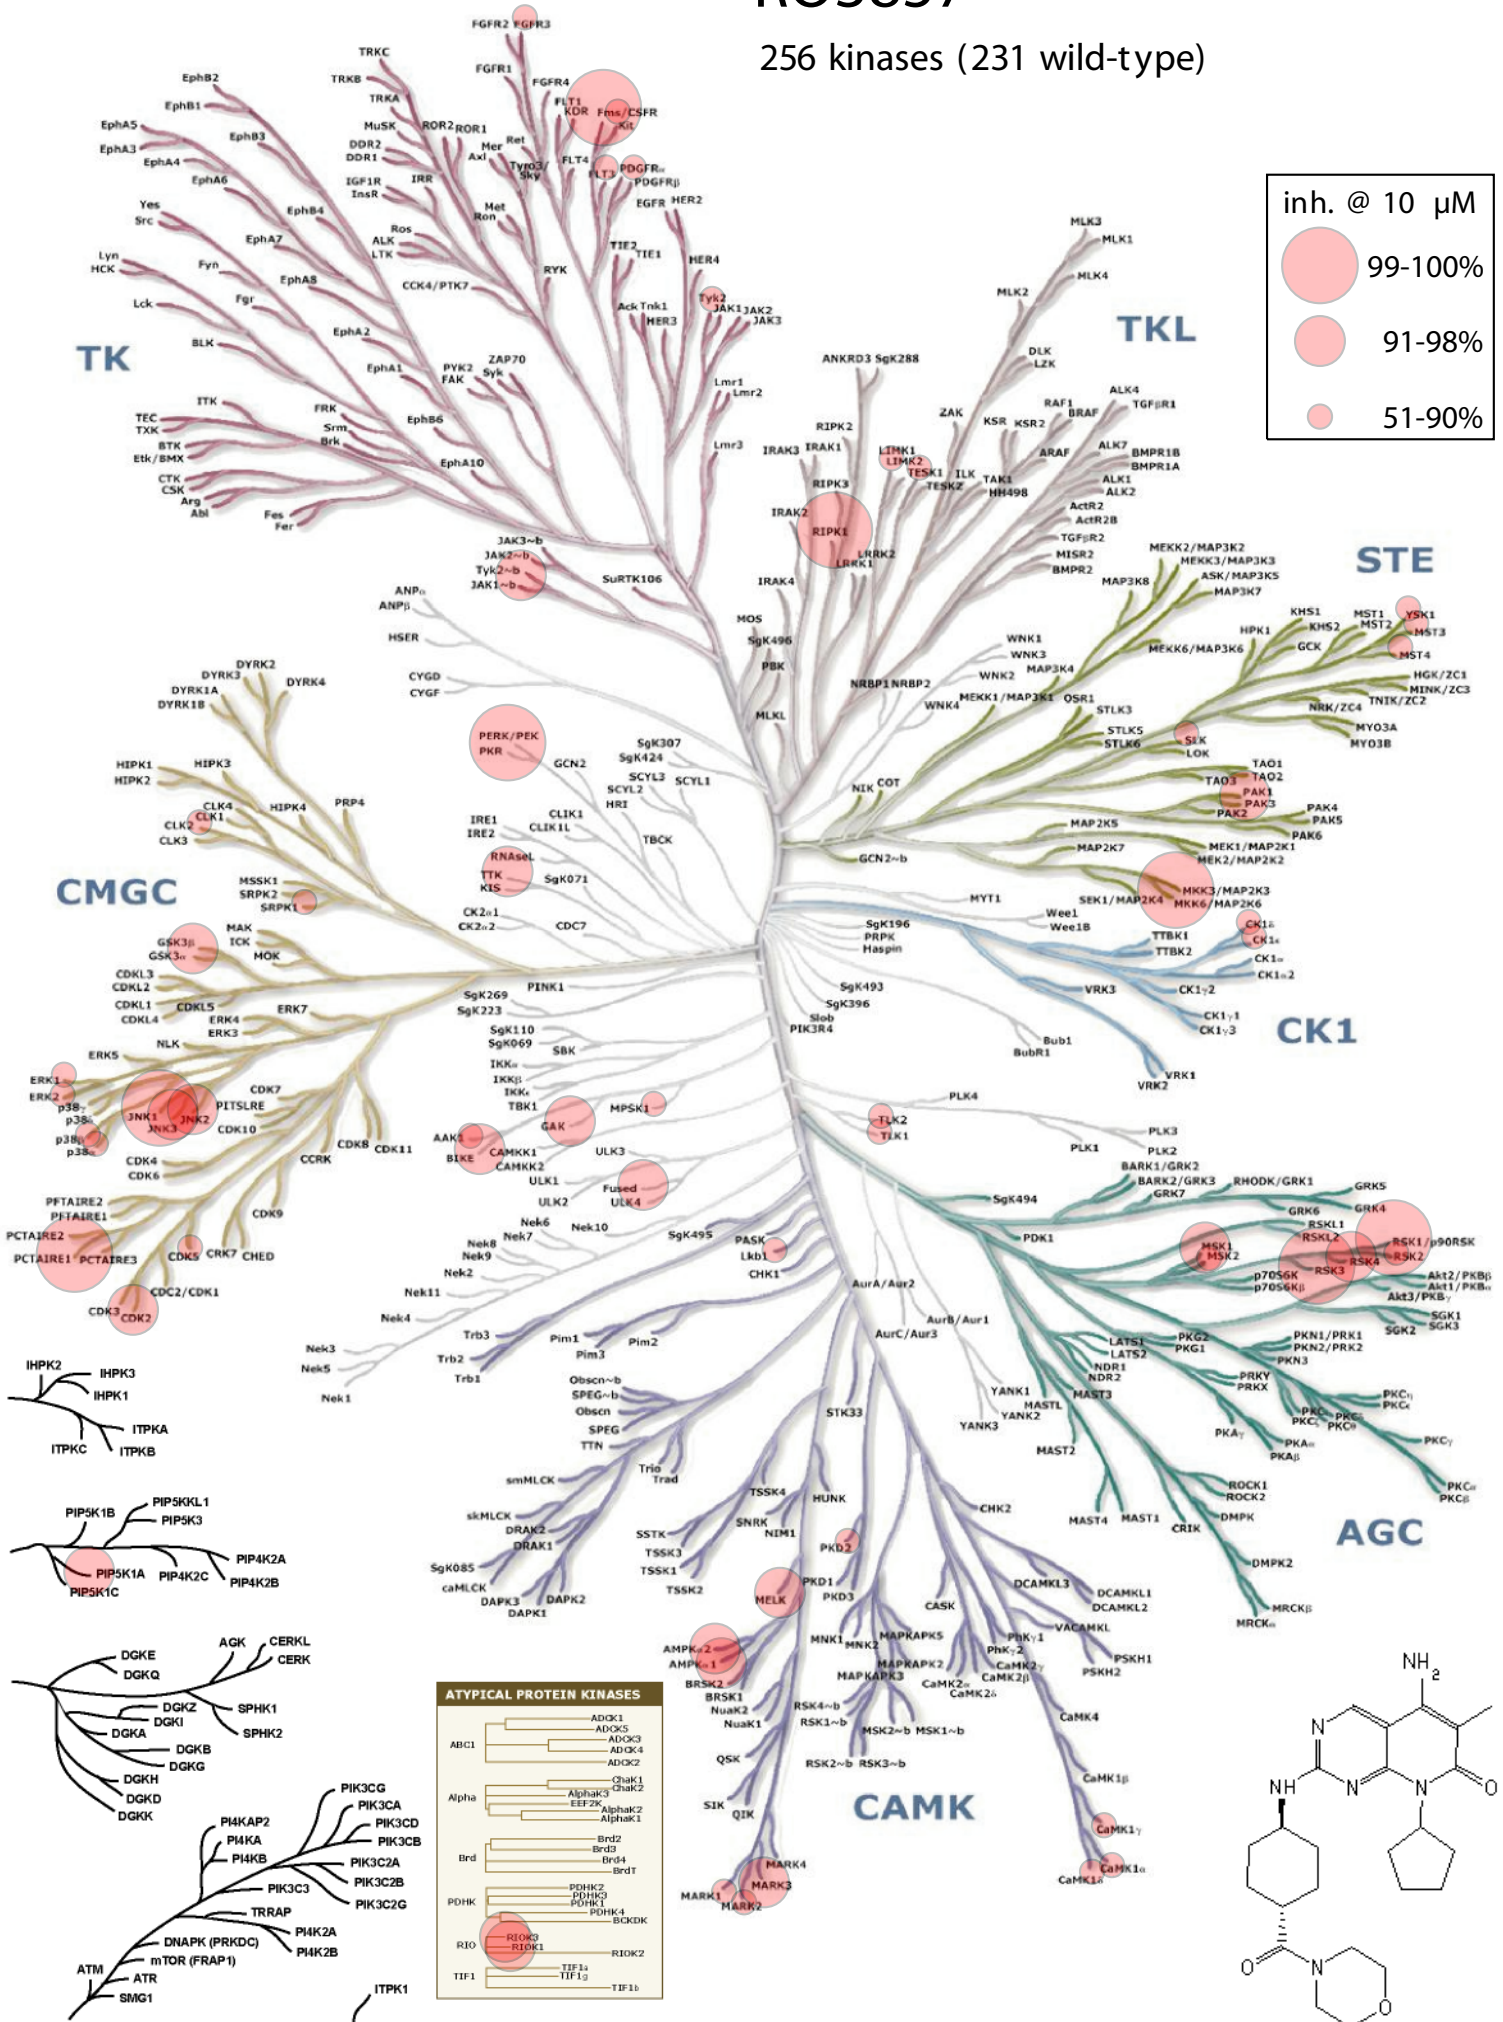

Supplement: NIHMS539452-supplement-supp_2.pdf [file NIHMS539452-supplement-supp_2.pdf]

# RO9568

317 kinases (290 wild-type)

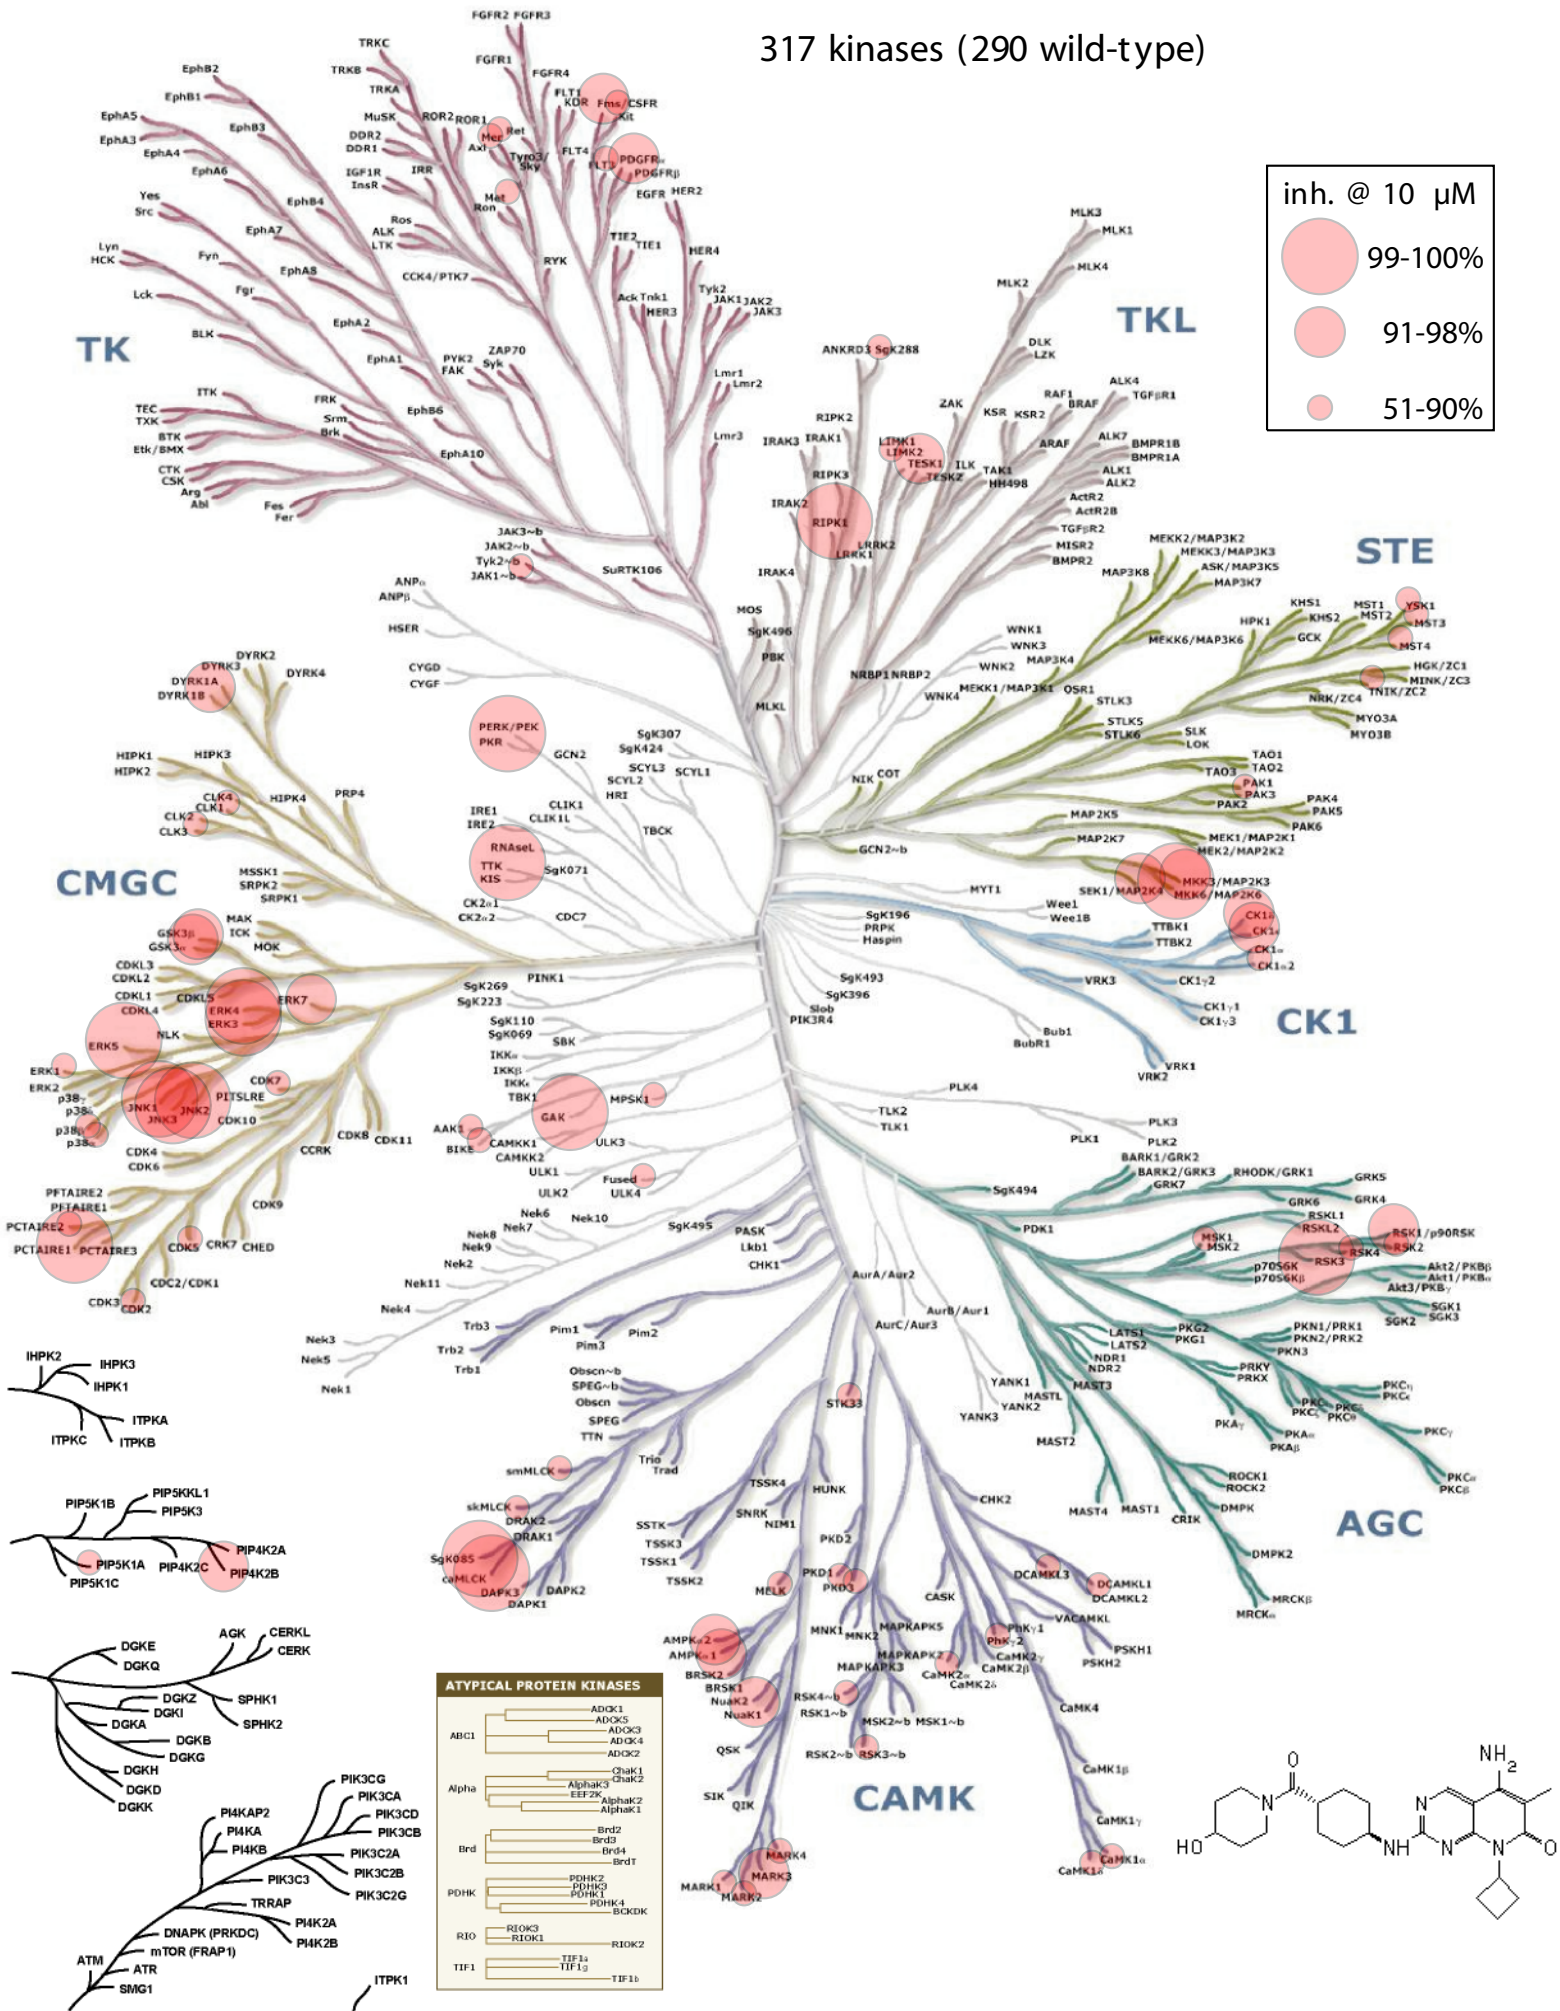

Supplement: NIHMS539452-supplement-supp_3.pdf [file NIHMS539452-supplement-supp_3.pdf]

# RO1652

227 kinases (202 wild-type)

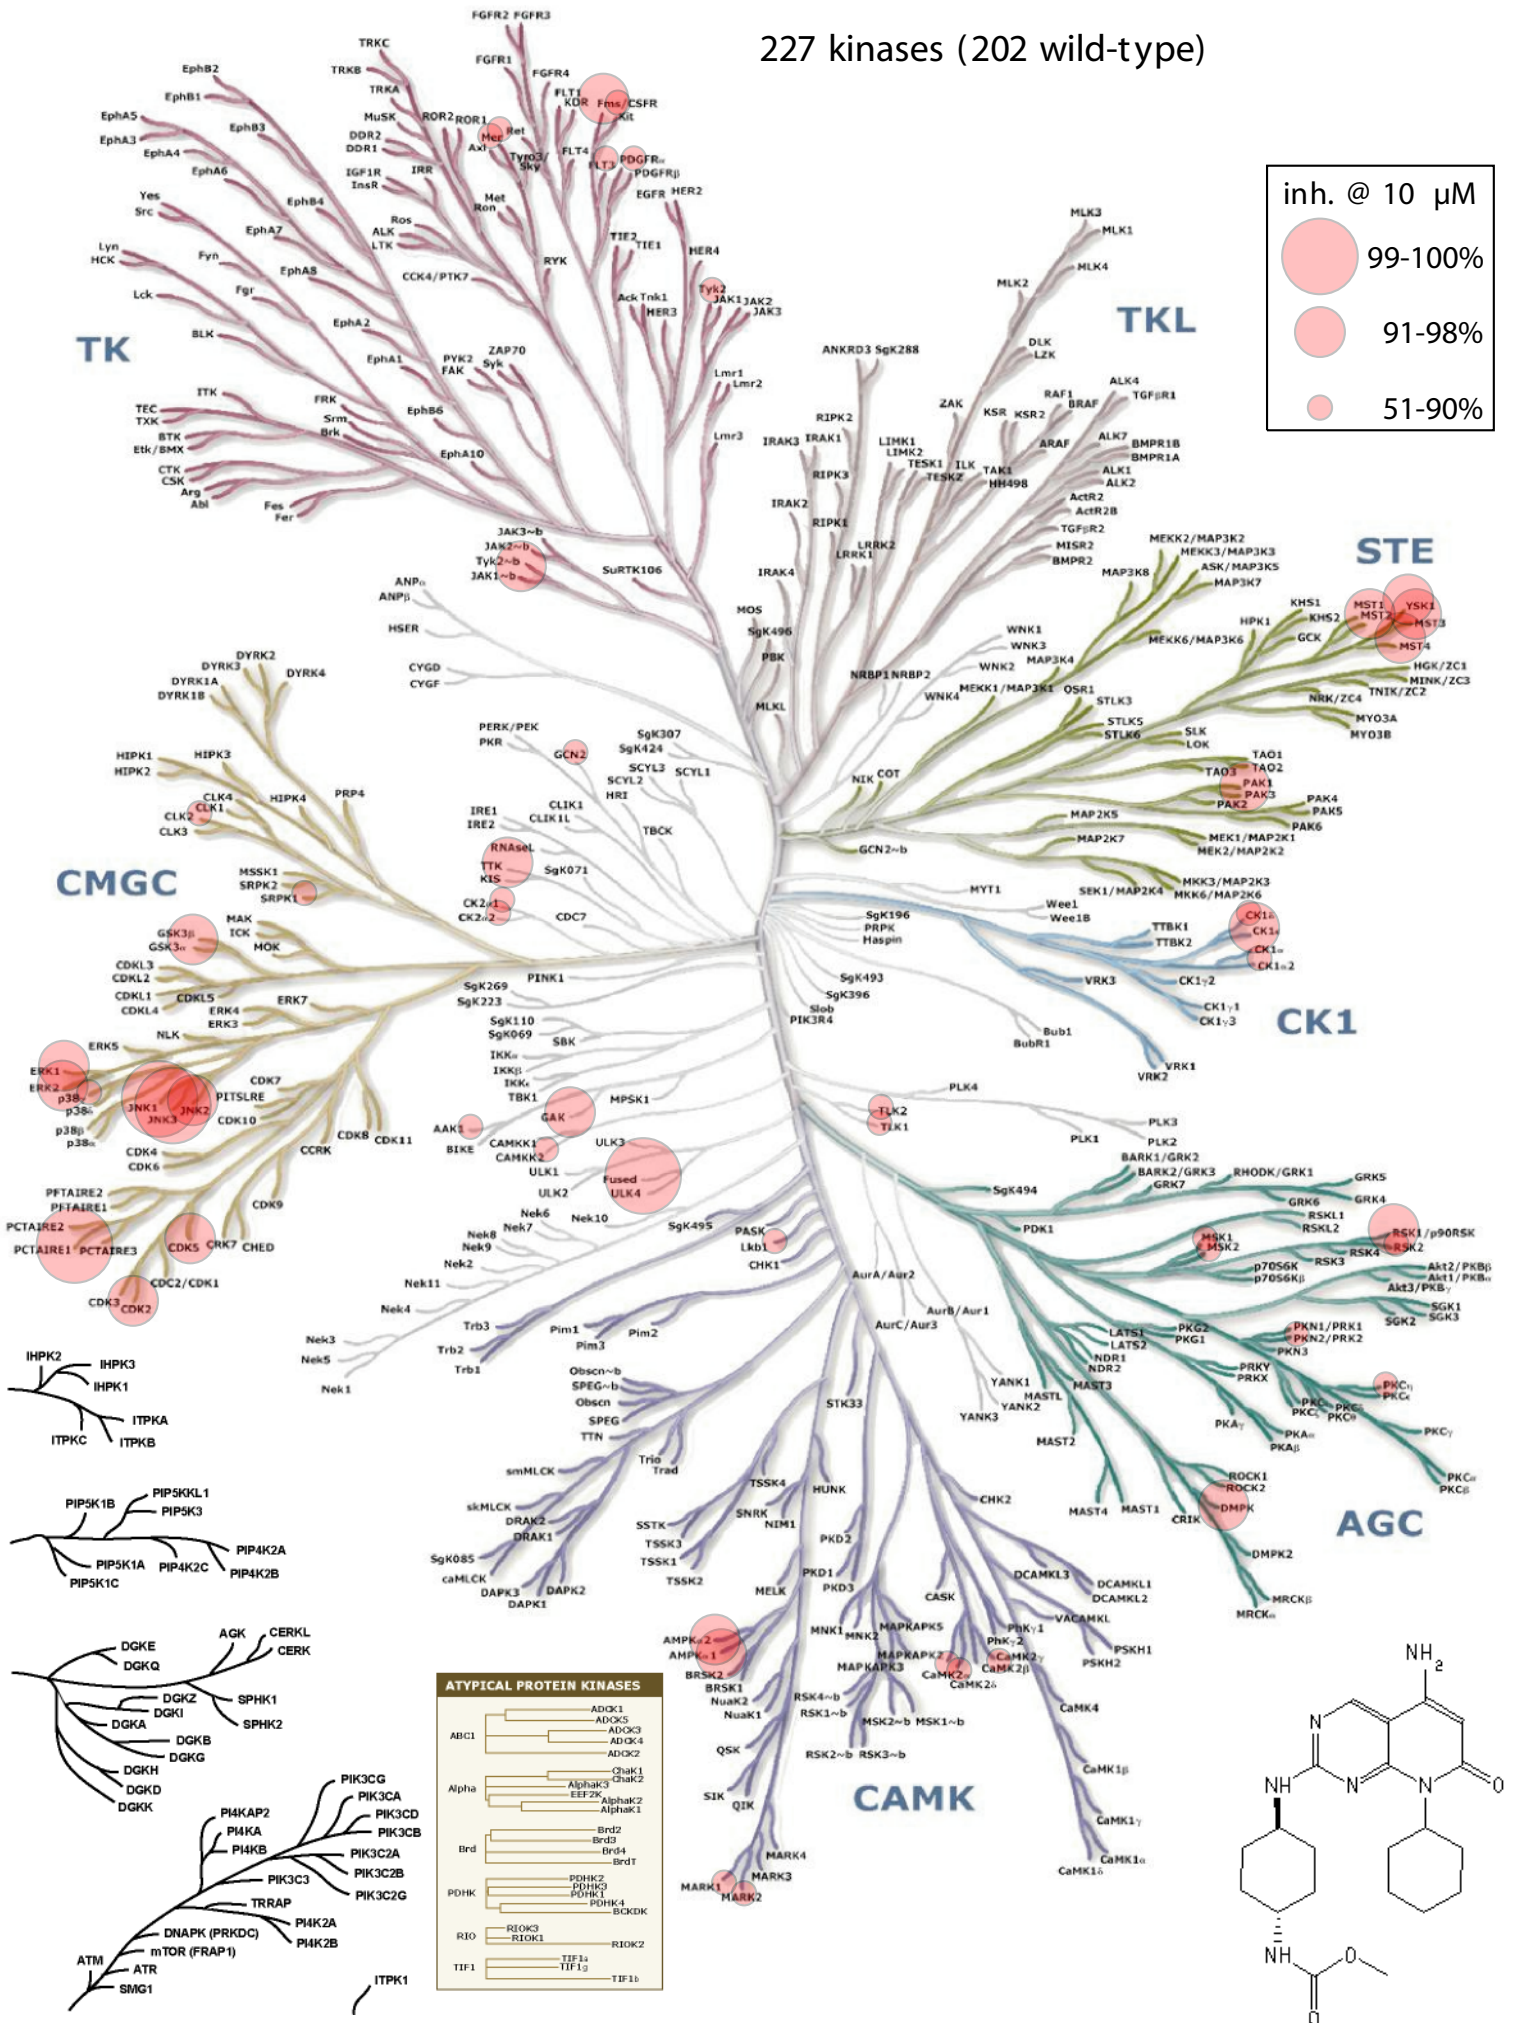

Supplement: NIHMS539452-supplement-supp_4.pdf [file NIHMS539452-supplement-supp_4.pdf]
